# Supplementary material
Source: Springer Nature journal article supplement (https://www.springermedizin.de/resource/supplementary/13058_2005_1332_MOESM7_ESM.pdf/9698874)

## Human Liver Tissue Slices

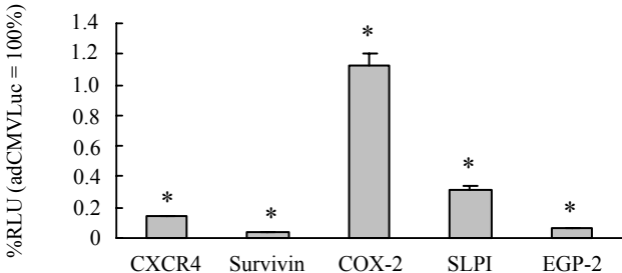

Supplement: MOESM7 [file 9698874]
